# Supplementary material for: Two novel lead(ii)-tetrazolate frameworks based on cubane [Pb4(OH)4]4+ clusters trapping long lifetime luminescence emission
Source: Royal Society of Chemistry journal article supplement (doi:10.1039/c2ce25078k), 2012-01-01
Supplement: c2ce25078k.pdf [file c2ce25078k.pdf]

## Two novel lead(II)-tetrazolate frameworks based on cubane [Pb<sub>4</sub>(OH)<sub>4</sub>]<sup>4+</sup> clusters trapping long lifetime luminescence emission

Jiayin Sun,<sup>a</sup> Daojun Zhang,<sup>b</sup> Li Wang,<sup>a</sup> Yu Cao,<sup>a</sup> Da Li,<sup>a</sup> Liying Zhang,<sup>a</sup> Wei Song,<sup>a</sup> Yong Fan<sup>\*a</sup> and Jianing Xu<sup>\*a</sup>

Received (in XXX, XXX) Xth XXXXXXXXXX 200X, Accepted Xth XXXXXXXXXX 200X

DOI: 10.1039/b000000x

Table S1 Selected bond lengths (Å) and angles (°) for compounds **1** and **2**.

| Compound <b>1</b>        |          |                               |          |
|--------------------------|----------|-------------------------------|----------|
| N(1)-Pb(4) <sup>#1</sup> | 2.688(8) | O(2)-Pb(3)                    | 2.417(7) |
| N(3)-Pb(1)               | 2.697(9) | O(2)-Pb(2)                    | 2.504(6) |
| N(4)-Pb(2)               | 2.727(8) | O(3)-Pb(3)                    | 2.330(7) |
| N(11)-Pb(3)              | 2.721(9) | O(3)-Pb(4)                    | 2.418(7) |
| N(12)-Pb(1)              | 2.729(9) | O(3)-Pb(1)                    | 2.449(6) |
| O(1)-Pb(4)               | 2.352(7) | O(4)-Pb(2)                    | 2.338(7) |
| O(1)-Pb(2)               | 2.384(7) | O(4)-Pb(3)                    | 2.353(6) |
| O(1)-Pb(1)               | 2.431(7) | O(4)-Pb(1)                    | 2.513(7) |
| O(2)-Pb(4)               | 2.322(8) | Pb(4)-N(1) <sup>#2</sup>      | 2.688(8) |
| O(1)-Pb(1)-O(3)          | 71.0(2)  | O(1)-Pb(2)-N(4)               | 74.0(3)  |
| O(1)-Pb(1)-O(4)          | 67.9(2)  | O(2)-Pb(2)-N(4)               | 137.0(3) |
| O(3)-Pb(1)-O(4)          | 68.7(2)  | O(3)-Pb(3)-O(4)               | 73.5(2)  |
| O(1)-Pb(1)-N(3)          | 82.0(3)  | O(3)-Pb(3)-O(2)               | 72.2(3)  |
| O(3)-Pb(1)-N(3)          | 135.1(3) | O(4)-Pb(3)-O(2)               | 71.5(2)  |
| O(4)-Pb(1)-N(3)          | 68.0(3)  | O(3)-Pb(3)-N(11)              | 75.7(3)  |
| O(1)-Pb(1)-N(12)         | 137.0(3) | O(4)-Pb(3)-N(11)              | 77.1(2)  |
| O(3)-Pb(1)-N(12)         | 81.3(2)  | O(2)-Pb(3)-N(11)              | 140.0(3) |
| O(4)-Pb(1)-N(12)         | 71.7(3)  | O(2)-Pb(4)-O(1)               | 73.8(2)  |
| N(3)-Pb(1)-N(12)         | 96.2(3)  | O(2)-Pb(4)-O(3)               | 72.3(3)  |
| O(4)-Pb(2)-O(1)          | 71.6(2)  | O(1)-Pb(4)-O(3)               | 72.9(2)  |
| O(4)-Pb(2)-O(2)          | 70.2(2)  | O(2)-Pb(4)-N(1) <sup>#2</sup> | 87.5(3)  |

|                                              |            |                                               |            |
|----------------------------------------------|------------|-----------------------------------------------|------------|
| O(1)-Pb(2)-O(2)                              | 70.0(2)    | O(1)-Pb(4)-N(1) <sup>#2</sup>                 | 70.9(2)    |
| O(4)-Pb(2)-N(4)                              | 76.9(2)    | O(3)-Pb(4)-N(1) <sup>#2</sup>                 | 142.3(2)   |
| <b>Compound 2</b>                            |            |                                               |            |
| Pb(1)-O(1) <sup>#1</sup>                     | 2.327(9)   | Pb(1)-Pb(1) <sup>#1</sup>                     | 3.8172(11) |
| Pb(1)-O(1)                                   | 2.398(12)  | Pb(1)-Pb(1) <sup>#3</sup>                     | 3.9170(9)  |
| Pb(1)-O(1) <sup>#2</sup>                     | 2.512(9)   | O(1)-Pb(1) <sup>#2</sup>                      | 2.327(9)   |
| Pb(1)-N(1)                                   | 2.660(13)  | O(1)-Pb(1) <sup>#1</sup>                      | 2.512(8)   |
| Pb(1)-O(2)                                   | 2.820(8)   | O(2)-Pb(1) <sup>#4</sup>                      | 2.820(8)   |
| Pb(1)-Pb(1) <sup>#2</sup>                    | 3.8172(11) | N(5)-Pb(1) <sup>#4</sup>                      | 3.000(10)  |
| O(1) <sup>#1</sup> -Pb(1)-O(1)               | 73.4(4)    | O(1)-Pb(1)-O(2)                               | 144.7(3)   |
| O(1) <sup>#1</sup> -Pb(1)-O(1) <sup>#2</sup> | 70.1(4)    | O(1) <sup>#2</sup> -Pb(1)-O(2)                | 112.6(4)   |
| O(1)-Pb(1)-O(1) <sup>#2</sup>                | 70.2(4)    | N(1)-Pb(1)-O(2)                               | 85.5(4)    |
| O(1) <sup>#1</sup> -Pb(1)-N(1)               | 82.3(4)    | Pb(1) <sup>#2</sup> -O(1)-Pb(1)               | 107.8(4)   |
| O(1)-Pb(1)-N(1)                              | 75.2(4)    | Pb(1) <sup>#2</sup> -O(1)-Pb(1) <sup>#1</sup> | 108.0(4)   |
| O(1) <sup>#2</sup> -Pb(1)-N(1)               | 140.4(4)   | Pb(1)-O(1)-Pb(1) <sup>#1</sup>                | 102.0(4)   |
| O(1) <sup>#1</sup> -Pb(1)-O(2)               | 75.0(4)    | Pb(1) <sup>#4</sup> -O(2)-Pb(1)               | 110.6(4)   |

Symmetry transformations used to generate equivalent atoms for **1**: #1 -x+1/2, y, z-1/2 #2 -x+1/2, y, z+1/2. For **2**: #1 -y, x, -z+3/2 #2 y, -x, -z+3/2 #3 -x, -y, z #4 x, y, -z+1 #5 -y+1/2, -x+1/2, -z+3/2 #6 y+1/2, x-1/2, -z+3/2 #7 -x, -y-1, -z+1.

Table S2 Bond lengths (Å) and angles (°) of hydrogen bonds for compounds **2**.

| D-H...A                          | d(D-H) | d(H...A) | d(D...A) | <(DHA) |
|----------------------------------|--------|----------|----------|--------|
| O(2)-H(10B)...N(4) <sup>#8</sup> | 0.97   | 2.59     | 3.50(2)  | 157.2  |
| O(2)-H(10B)...N(3) <sup>#8</sup> | 0.97   | 1.71     | 2.68(2)  | 175.2  |
| O(2)-H(10A)...N(5) <sup>#9</sup> | 0.97   | 2.60     | 3.41(2)  | 141.6  |
| O(2)-H(10A)...N(6) <sup>#9</sup> | 0.97   | 1.89     | 2.85(2)  | 172.4  |

Symmetry transformations used to generate equivalent atoms: #1 -y, x, -z+3/2 #2 y, -x, -z+3/2 #3 -x, -y, z #4 x, y, -z+1 #5 -y+1/2, -x+1/2, -z+3/2 #6 y+1/2, x-1/2, -z+3/2 #7 -x, -y-1, -z+1 #8 -x+1/2, y+1/2, z #9 -x, -y, -z+1.

Table S3 Factors influenced the synthesis for compound **1** and **2**.

| Run | $n\text{Pb}(\text{Ac}):$<br>$n\text{H}_2\text{BDT}$ | $\text{V}(\text{H}_2\text{O})$<br>mL | Temperature<br>°C | Reaction<br>time/d | pH   | Results            |
|-----|-----------------------------------------------------|--------------------------------------|-------------------|--------------------|------|--------------------|
| 1   | 3:1                                                 | 3                                    | 160               | 2                  | 5.1  | Complex <b>1+2</b> |
| 2   | 3:2                                                 | 3                                    | 160               | 2                  | 5.1  | Complex <b>1</b>   |
| 3   | 3:3                                                 | 3                                    | 160               | 2                  | 5.1  | Complex <b>1+2</b> |
| 4   | 3:2                                                 | 3                                    | 140               | 2                  | 5.1  | Complex <b>1</b>   |
| 5   | 3:2                                                 | 3                                    | 180               | 2                  | 5.1  | Complex <b>1</b>   |
| 6   | 3:2                                                 | 3                                    | 160               | 5                  | 5.1  | Complex <b>1+2</b> |
| 7   | 3:2                                                 | 5~11                                 | 160               | 2                  | 5.1  | Complex <b>1+2</b> |
| 8   | 3:2                                                 | 13                                   | 160               | 2                  | 5.04 | Complex <b>2</b>   |
| 9   | 3:2                                                 | 3                                    | 160               | 2                  | 4.8  | amorphous          |
| 10  | 3:2                                                 | 3                                    | 160               | 2                  | 6    | amorphous          |
| 11  | 3:2                                                 | 3                                    | 160               | 2                  | 6.5  | amorphous          |
| 12  | 3:2                                                 | 3                                    | 160               | 2                  | 7    | amorphous          |

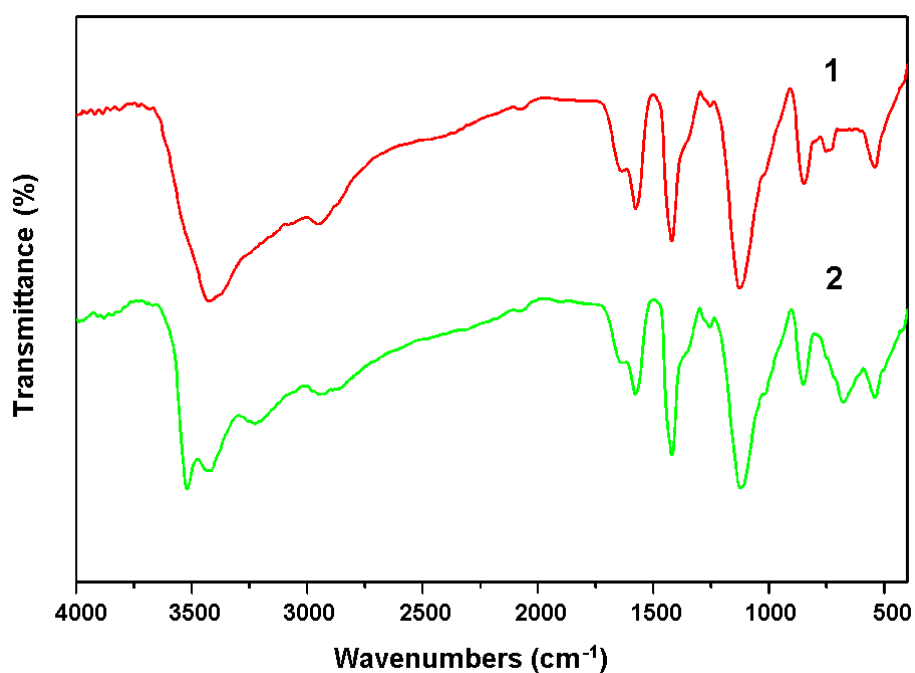

Fig. S1 IR Spectra of compound **1** and **2**.

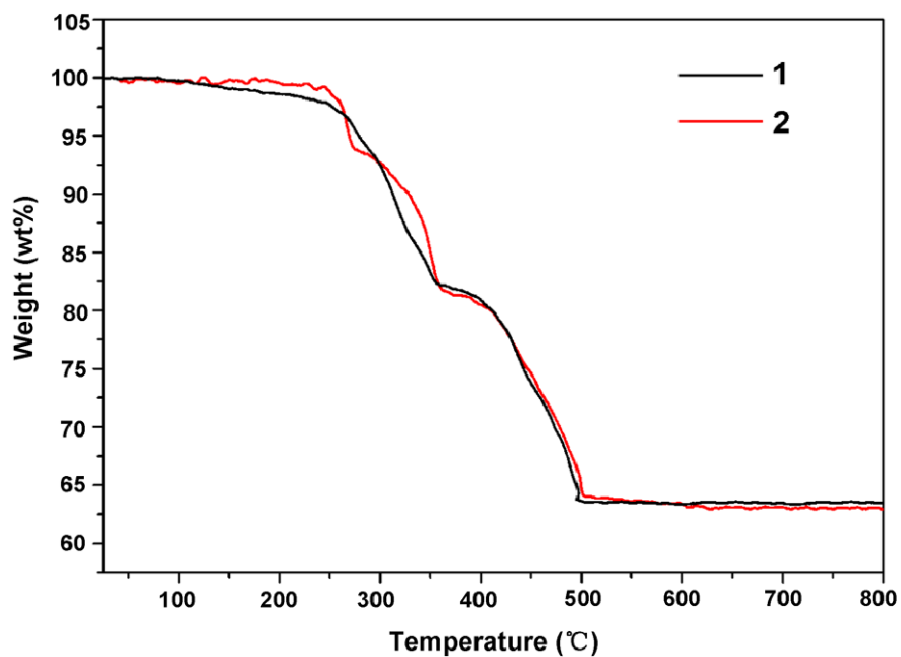

Fig. S2 The TGA curve of compound 1 and 2 measured under flowing air.

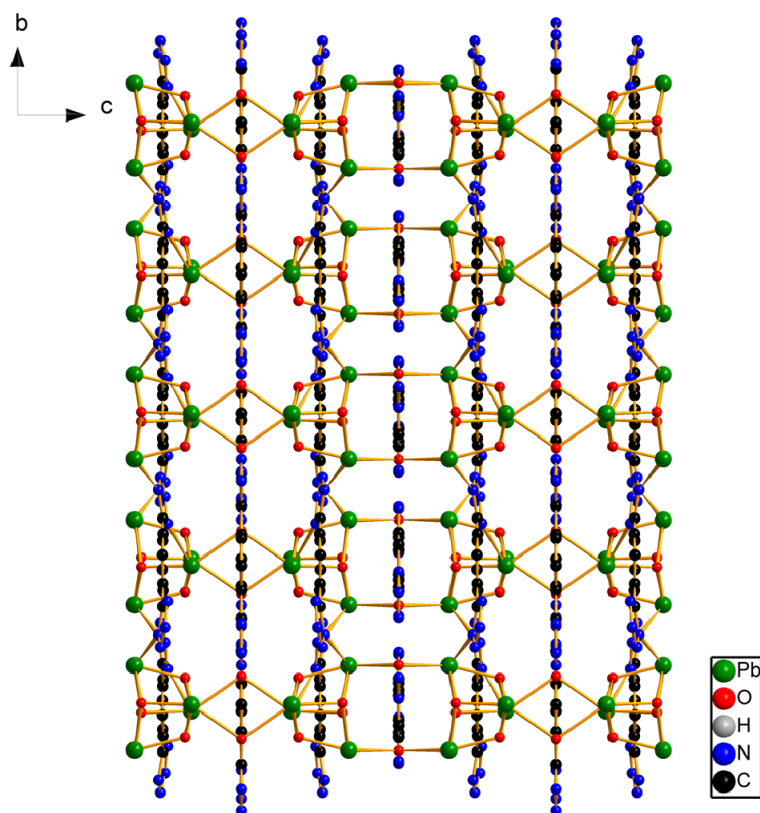

Fig. S3 3D network representation of complex 2 in *bc* plane.

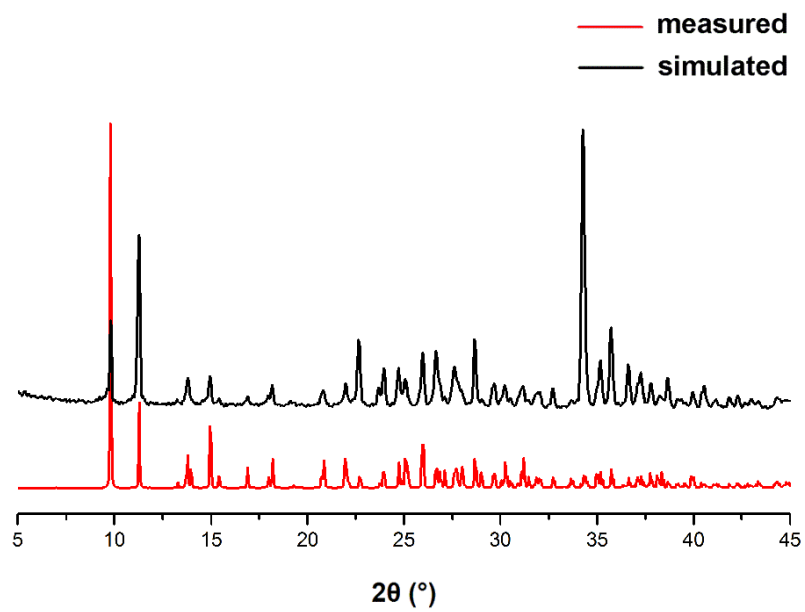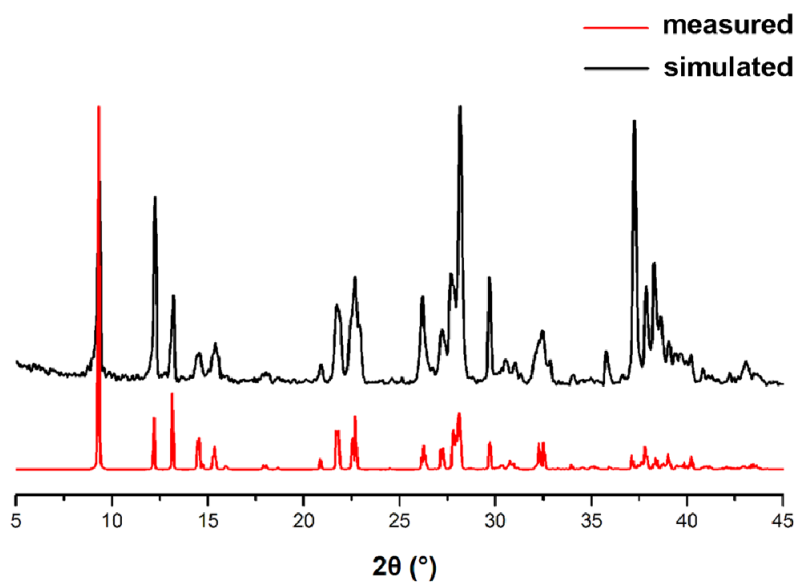

**Fig. S4** Simulated and experimental X-ray diffraction patterns of compounds **1** (top) and **2** (bottom).
